# Supplementary material
Source: PubMed Central journal article supplement (PMC6597828)
Supplement: supp_RA119.007600_143187_3_supp_326617_pr4kjz.pdf [file supp_RA119.007600_143187_3_supp_326617_pr4kjz.pdf]

Glycosyltransferase UGT76E1 forms 12-*O*-glucosylpyranosyl-jasmonic acid in wounded *Arabidopsis thaliana* leaves

**Sven Haroth<sup>1</sup>, Kirstin Feussner<sup>1,2</sup>, Amélie A. Kelly<sup>1</sup>, Krzysztof Zienkiewicz<sup>1</sup>, Cornelia Herrfurth<sup>1,2</sup>, Ivo Feussner<sup>1,3,#</sup>**

From the <sup>1</sup>University of Goettingen, Albrecht-von-Haller-Institute for Plant Sciences, Department of Plant Biochemistry, Goettingen, Germany; <sup>2</sup>University of Goettingen, Goettingen Center for Molecular Biosciences (GZMB), Service Unit for Metabolomics and Lipidomics, D-37077 Goettingen, Germany; <sup>3</sup>University of Goettingen, Goettingen Center for Molecular Biosciences (GZMB), Department of Plant Biochemistry, Goettingen, Germany

Running title: *UGT76E1 glycosylates 12-hydroxy-jasmonic acid*

Figure S1: Protein purification of UGT76E1, UGT76E2, UGT7E11, UGT76E12, and UGT74F1

Figure S2: 12-hydroxy-jasmonoyl-isoleucine can be detected in the quasi-native substrate mixture, but is not accepted as substrate for glycosylation by UGT76E1, UGT76E2, UGT7E11, UGT76E12, or UGT74F1

Figure S3: Enzyme kinetics with the preferred substrates

Figure S4: Jasmonate profiles of *A. thaliana* after wounding

Figure S5: Mutation of *UGT76E1* effects its expression

Figure S6: Gene expression of jasmonate signaling-related genes is not changed in wounded leaves of mutant plants with altered UGT76E1 expression

Figure S7: 12-carboxy-JA was identified in leaves after wounding

Table S1: Calculated protein parameters and predicted localizations for UGT76E1, UGT76E2, UGT76E11, UGT76E12 and UGT74F1

Table S2: Chemical structures of the substrates of the radiolabeled specificity assay

Table S3: Confirmation of the chemical structure of UGT-substrates and products by high-resolution LC-MS/MS analyses

Table S4: Buffer concentrations for protein purifications

Table S5: Oligonucleotides used in this work

Table S6: CRISPR target sequences for *UGT76E1*, *UGT76E2*, *UGT76E11*, and *UGT76E12*

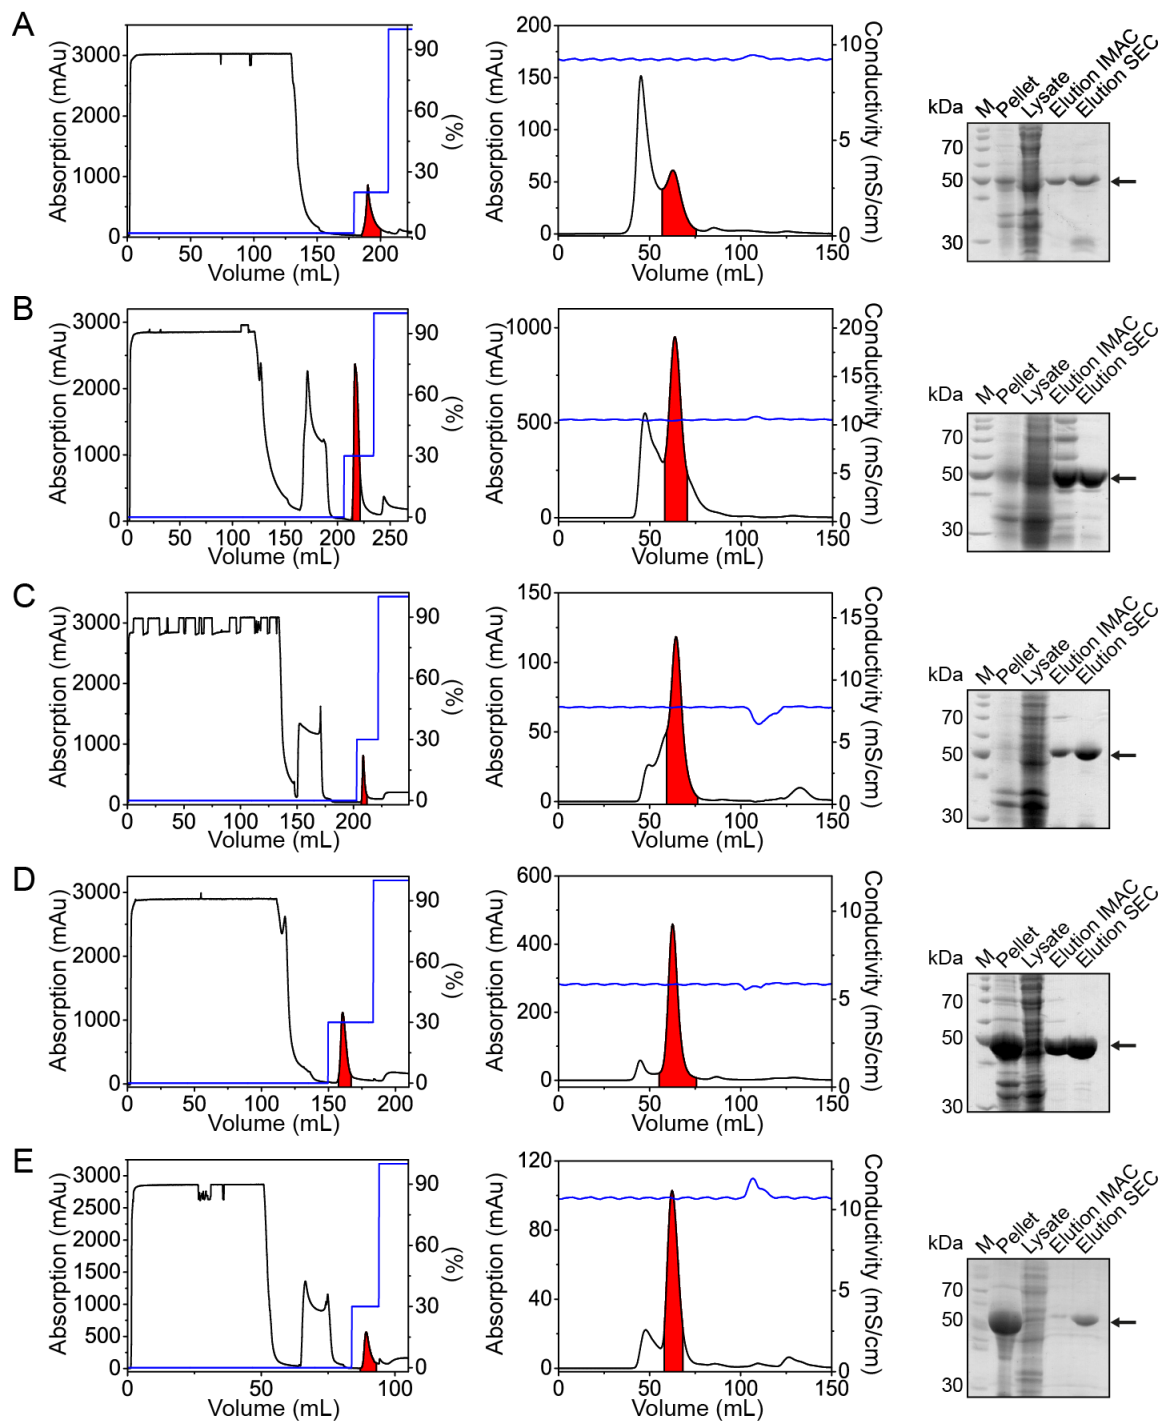

**Figure S1: Protein purification of UGT76E1, UGT76E2, UGT7E11, UGT76E12, and UGT74F1**

UGTs fused to an N-terminal His-tag and heterologously expressed in *E. coli* BL21 Star (DE3) were purified by a two-step protein purification strategy of immobilized metal affinity chromatography (IMAC) and size exclusion chromatography (SEC). Shown are the chromatograms for the respective IMAC- and SEC-purification steps and a sodium dodecyl sulfate (SDS)-polyacrylamide gel electrophoresis (PAGE) with samples of pellet, lysate, IMAC eluate, and SEC eluate. Arrows indicate the size of the respective purified protein. Chromatograms illustrate the absorption at 280 nm (milli absorption units (mAU)) during elution. For IMAC, the second y-axis shows the concentration of elution buffer (%). For SEC, the second y-axis shows the conductivity (mS/cm). The fraction that contained the protein of interest is marked in red. Purification of **A** UGT76E1 **B** UGT76E2 **C** UGT7E11 **D** UGT76E12 **E** UGT74F1. The depicted purification is representative for at least four independent purifications for each UGT.

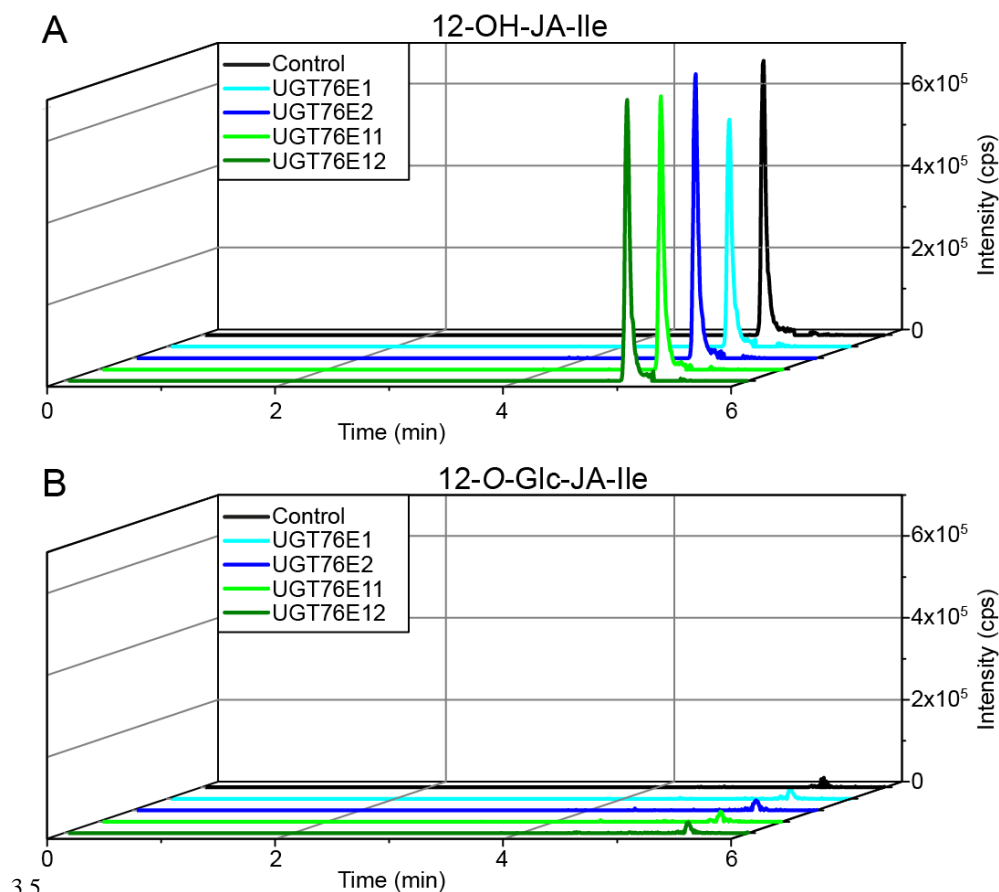

3.5

**Figure S2: 12-hydroxy-jasmonoyl-isoleucine can be detected in the quasi-native substrate mixture, but is not accepted as substrate for glycosylation by UGT76E1, UGT76E2, UGT76E11, UGT76E12, or UGT74F1**

Plants were grown for six weeks under short day conditions. Leaves were wounded three times across the mid vein by squeezing with forceps. Damaged rosette leaves were harvested at 5 hpw (pool of 10 plants per sample) and directly frozen in liquid nitrogen for subsequent extraction of metabolites. Metabolite extracts were resolved in 50 mM Tris pH 8, 100 mM NaCl buffer and the assay was performed with 0.1 mM UDP-Glc and 100 µg of the indicated active UGT-enzymes or inactive enzyme (control) for 1 h at 25 °C. The reactions were stopped by adding acetonitrile and analyzed by LC-MS. Given are the extracted ion chromatograms of **A** 12-hydroxy-jasmonoyl-isoleucine (12-OH-JA-Ile) in the negative ionization mode ( $[M-H]^-$  338.1967) and of **B** 12-*O*-glucosyl-jasmonoyl-isoleucine (12-*O*-Glc-JA-Ile as a possible UGT-product) in the negative ionization ( $[M-H]^-$  500.2496). 12-*O*-Glc-JA-Ile is not detectable in *A. thaliana* leaves 5 hpw. All chromatograms show relative signal intensities fixed to  $7 \times 10^7$  counts per second (cps) over time. The data are representative for three measurements of one experiment.

## UGT76E1 glycosylates 12-hydroxy-jasmonic acid

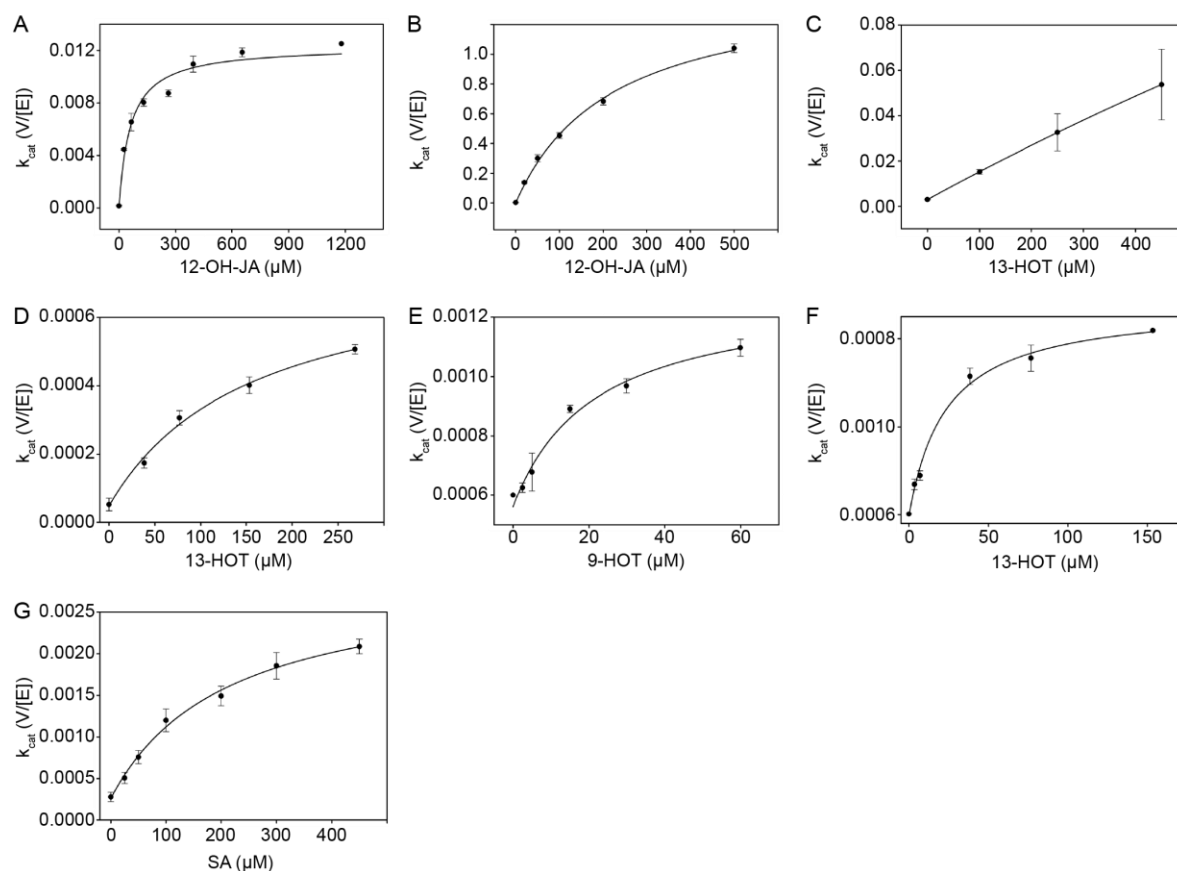

**Figure S3: Enzyme kinetics with the preferred substrates**

The enzymatic parameters for UGT76E2, UGT76E11, UGT76E12, and UGT74F1 were determined by spectrophotometric assay. The UGT-reactions were coupled via the co-product UDP to the pyruvate kinase and the lactate dehydrogenase in 1 : 1 : 1 stoichiometry. The reactions were performed with 5  $\mu\text{g}$  of the respective UGT in gel filtration buffer, 0.5 mM UDP-Glc, and indicated substrate concentrations at 25  $^{\circ}\text{C}$ . The reaction was monitored at 340 nm for 600 s. Kinetics and Michaelis-Menten fit for **A** UGT76E1 with 12-hydroxy-jasmonic acid (12-OH-JA, (due to limitations in 12-OH-JA availability, the value for 1200  $\mu\text{M}$  was measured once only) **B** UGT76E2 with 12-OH-JA (due to limitations in 12-OH-JA availability, the value for 500  $\mu\text{M}$  was measured twice) **C** UGT76E11 with 13-hydroxy-octadecatrienoic acid (13-HOT). **D** UGT76E12 with 9-hydroxy-octadecatrienoic acid (9-HOT). **E** UGT76E12 with 13-HOT (due to limitations in 13-HOT availability, the value for 150  $\mu\text{M}$  was measured only once). **F** UGT76E12 with 13-HOT. **G** UGT74F1 with salicylic acid (SA). If not stated otherwise, the data are mean values with standard deviation of three biological replicates.

*UGT76E1* glycosylates 12-hydroxy-jasmonic acid

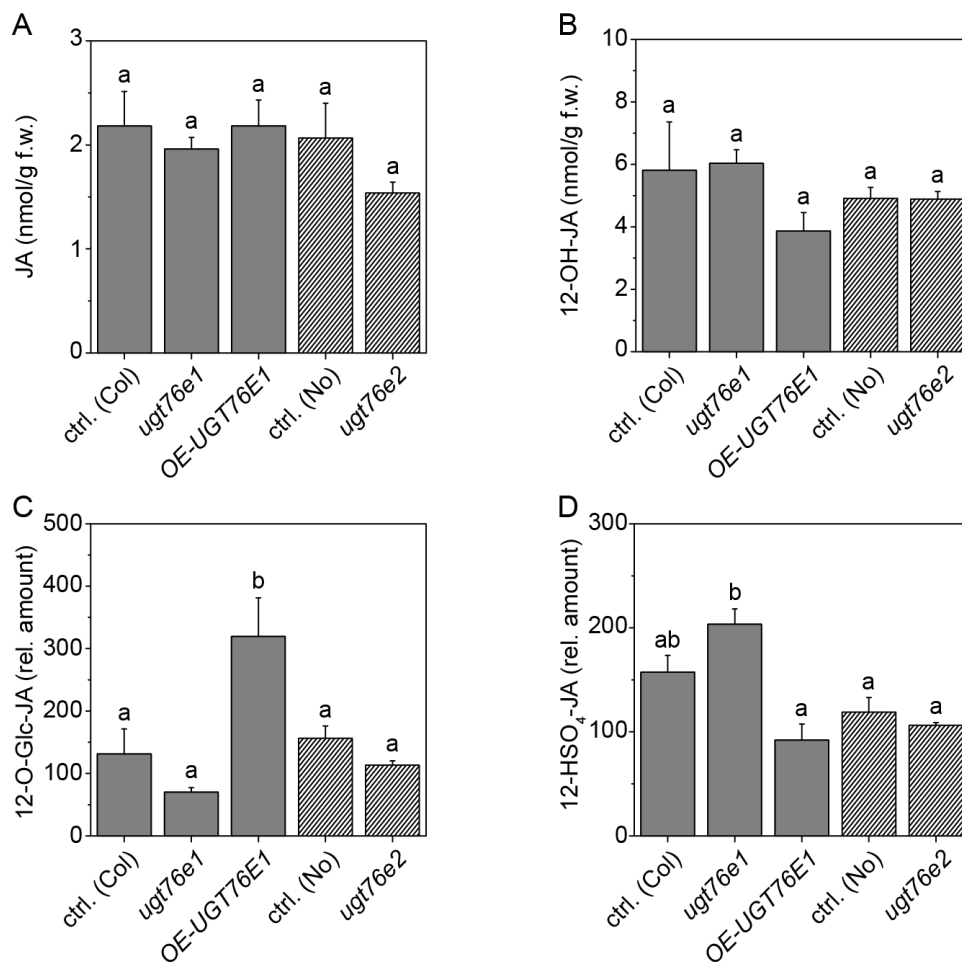

**Figure S4: Jasmonate profiles of *A. thaliana* after wounding**

Metabolite levels of the Columbia 0 WT (ctrl. (Col)), a respective *UGT76E1*-CRISPR/Cas-mutant (*ugt76e1*), an overexpresser of *UGT76E1* (*OE-UGT76E1*) (grey bars) as well as the Nossen control (ctrl. (No)) and the respective *ugt76e2* mutant (striped bars) were determined. For the wounding experiment, leaves were wounded three times across the mid vein. Damaged rosette leaves were harvested at 5 hours post wounding, extracted, and analyzed by LC-MS/MS. Quantitative data are given in nmol/g fresh weight for **A** jasmonic acid (JA), **B** jasmonoyl-isoleucine (JA-Ile), and **D** 11/12-hydroxy-JA (11/12-OH-JA). Relative amounts were given for **C** 12-hydroxy-JA-Ile (12-OH-JA-Ile), **E** 12-*O*-glucosyl-JA (12-*O*-Glc-JA), and **F** 12-hydroxy-JA sulfate (12-SO<sub>4</sub>-JA). The data show means of 3-6 biological replicates + SEM and one-sided ANOVA-test (p=0.05, turkey test).

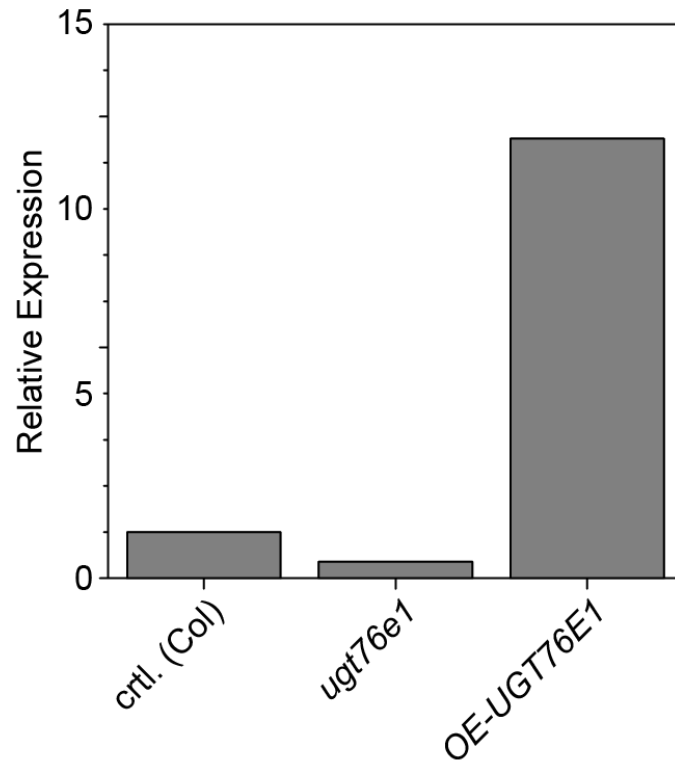

**Figure S5: Mutation of *UGT76E1* effects its expression**

Quantitative real-time PCR of *UGT76E1* in Columbia 0 WT (ctrl. (Col)), a respective *UGT76E1*-CRISPR/Cas-mutant (*ugt76e1*), and an overexpressor of *UGT76E1* (*OE-UGT76E1*) 2 hours post wounding. Plants were grown for six weeks under short day conditions and wounded. RNA was isolated. All expression values are normalized to *Actin 8* as reference and to the WT. Each data point represents the mean of 1 to 3 biological replicates.

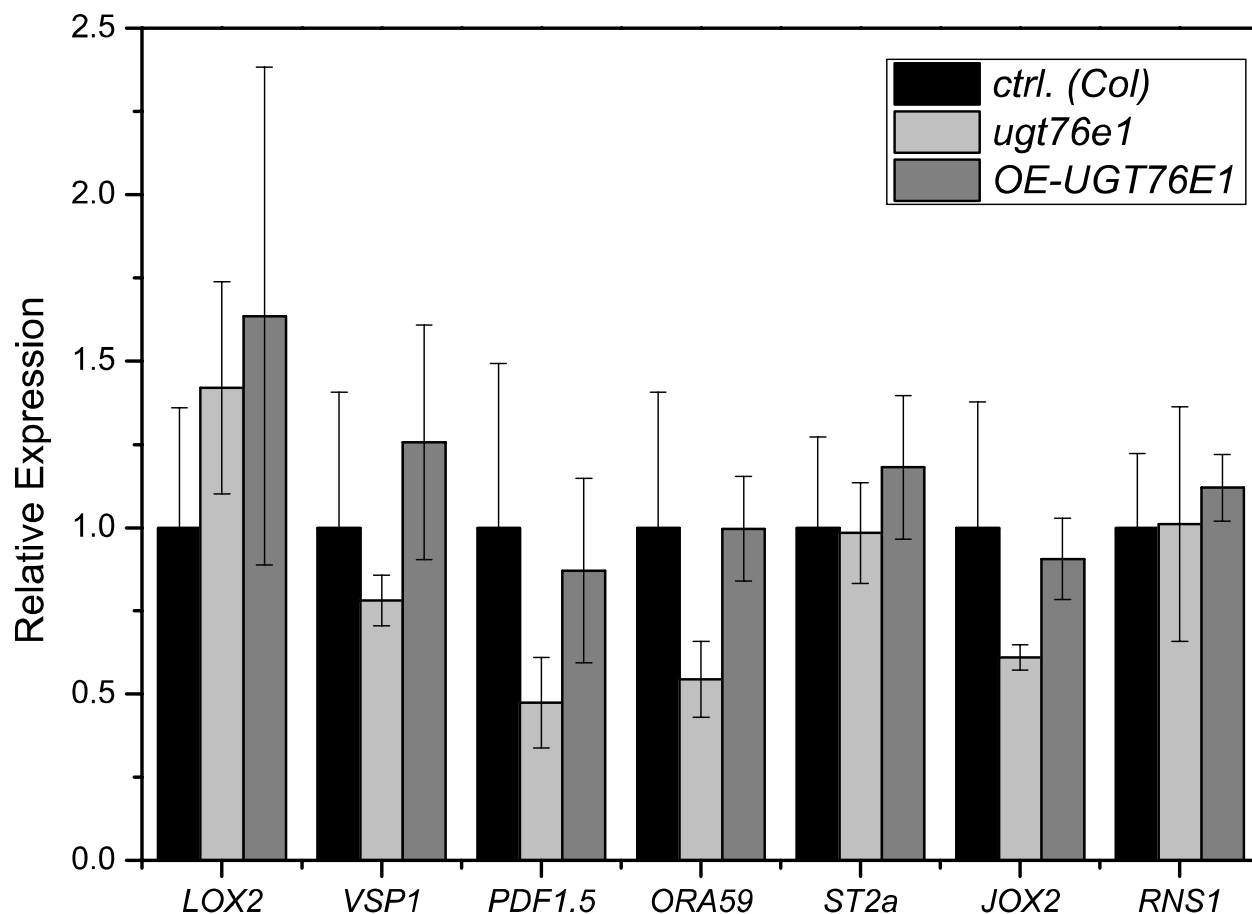

**Figure S6: Gene expression of jasmonate signaling-related genes is not changed in wounded leaves of mutant plants with altered *UGT76E1* expression**

Quantitative real-time PCR of *LOX2* (*LIPOXYGENASE2*), *VSP1* (*VEGETATIVE STORAGE PROTEIN1*), *PDF1.5* (*PLANT DEFENSIN 1.5*), *ORA59* (*OCTADECANOID-RESPONSIVE ARABIDOPSIS AP2/ERF gene 59*), *ST2a* (*SULFOTRANSFERASE a*), *JOX2* (*JASMONATE OXIDASE2*) and *RNS1* (*RIBONUCLEASEI*) in wounded leaves in Columbia 0 WT (ctrl. (Col)), an *UGT76E1*-CRISPR/Cas-mutant (*ugt76e1*), and an overexpressor of *UGT76E1* (*OE-UGT76E1*). Plants were grown for six weeks under short day conditions. Rosette leaves were wounded three times across the mid vein and harvested straight into liquid nitrogen after 5 hours. RNA was isolated. All expression values are normalized to *Actin 8* as reference and to the WT. Each data point represents the mean of 3 to 6 biological replicates with standard error.

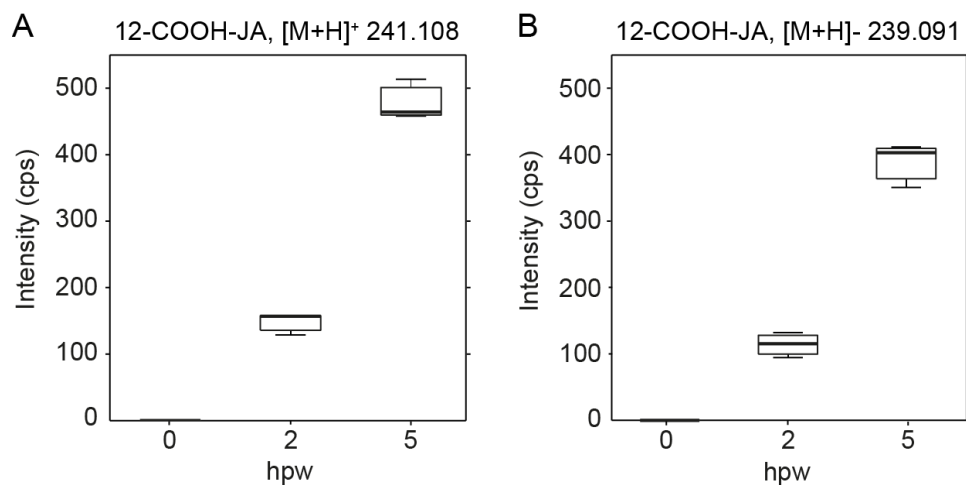

**Figure S7: 12-carboxy-JA was identified in leaves after wounding**

The metabolite 12-carboxy-JA (12-COOH-JA) was identified in the *ex vivo* metabolite fingerprinting analysis. Plants were wounded three times across the mid vein. Damaged rosette leaves were harvested at 0, 2, and 5 hours post wounding (hpw), extracted, and used as substrate mix for the *ex vivo* activity assay. The extracts were resolved in 50 mM Tris pH 8, 100 mM NaCl buffer and 20  $\mu$ l acetonitrile. Samples were analyzed by mass spectrometry with a method developed for non-targeted fingerprinting. The particular features of 12-COOH-JA were found in both the **A** positive ionization mode and **B** in the negative ionization mode shown as Box-Whisker-plots. The data represent three measurements of one experiments. 10 plants were pooled for each time point of one experiment. Data were analyzed with the MarVis tool.



**Table S1: Calculated protein parameters and predicted localizations for UGT76E1, UGT76E2, UGT76E11, UGT76E12 and UGT74F1**

The table depicts molecular weight (MW), specific extinction coefficient at 280 nm ( $\epsilon$ ), theoretical isoelectric point (pI), presence of a signal peptide (SignalP), target peptides (TargetP), and the number of transmembrane domains (TMHMM) for UGT76E1, UGT76E2, UGT76E11, UGT76E12, and UGT74F1. The protein parameters were calculated with ProtParam and localization predictions were done with SignalP, TargetP (plant settings), and TMHMM online tools. Access was 04.05.2018. Reaction optima were determined in reactions of 0.1 mM  $\omega$ -hydroxy-hexadecanoic acid and 0.5 mM UDP-Glc incubated with 30  $\mu$ g UGT at 25 °C for 1 h. Optimal reaction temperature (opt. Temp.) was determined in the range of 4 to 50 °C and optimal pH-values (opt. pH) were determined between pH 3 – 11 in the Britton-Robinson buffer system. The best product formation was detected by LC-MS and given here. Data represent at least three independent experiments for every enzyme.

| Parameter                                       | UGT76E1       | UGT76E2 | UGT76E11 | UGT76E12 | UGT74F1 |
|-------------------------------------------------|---------------|---------|----------|----------|---------|
| MW (kDa)                                        | 50.8          | 50.1    | 50.6     | 51.7     | 50.3    |
| $\epsilon$ (kM <sup>-1</sup> cm <sup>-1</sup> ) | 66.4          | 63.5    | 58.0     | 55.5     | 62.4    |
| pI                                              | 6.6           | 5.4     | 5.9      | 6.0      | 5.5     |
| SignalP                                         | /             | /       | /        | /        | /       |
| TargetP                                         | mitochondrial | /       | /        | /        | /       |
| TMHMM (no.)                                     | 0             | 0       | 0        | 0        | 0       |
| Opt. Temp (° C)                                 | 20            | 30      | 25       | 30       | /       |
| Opt. pH                                         | 7.5           | 7.5     | 8.0      | 8.0      | /       |

*UGT76E1 glycosylates 12-hydroxy-jasmonic acid*

**Table S2: Chemical structures of the substrates of the radiolabeled specificity assay**

Chemical structures of hexadecanoic acid (16:0),  $\omega$ -hydroxy-16:0 ( $\omega$ -OH-16:0), 2-hydroxy-16:0 (2-OH-16:0), 3-hydroxy-16:0 (3-OH-16:0), hexadecanol (OH-C16), benzoic acid (BA), salicylic acid (SA), pipercolic acid (Pip), indole-3-carboxylic acid (ICA), abscisic acid (ABA), zeatin, gibberellic acid (GA), 12-oxo-phytodienoic acid (12-OPDA), JA, 12-hydroxy-JA (12-OH-JA), 11-hydroxy-JA (11-OH-JA), 12-hydroxy-JA-methyl ester (12-OH-JA-ME), quercetin, dihydro-myricetin (dh-myricetin), and dihydro-kaempferol (dh-kaempferol).

|    | Substrate         | Structure |
|----|-------------------|-----------|
| 1  | 12-OPDA           |           |
| 2  | JA                |           |
| 3  | 12-OH-JA          |           |
| 4  | 11-OH-JA          |           |
| 5  | 12-OH-JA-ME       |           |
| 6  | 16:0              |           |
| 7  | $\omega$ -OH-16:0 |           |
| 8  | 2-OH-16:0         |           |
| 9  | 3-OH-16:0         |           |
| 10 | OH-C16            |           |
| 11 | BA                |           |
| 12 | SA                |           |
| 13 | Pip               |           |
| 14 | ICA               |           |
| 15 | ABA               |           |
| 16 | Zeatin            |           |
| 17 | GA                |           |
| 18 | Quercetin         |           |
| 19 | Dh-Myricetin      |           |
| 20 | Dh-Kaempferol     |           |

**Table S3: Confirmation of the chemical structure of UGT-substrates and products by high-resolution LC-MS/MS analyses**

| ID | Marker                                                  | RT (min) | Exact mass (Da) | detected ion      | Sum formula                                    | Ref.      | identity conf. by | Specific fragments                                                                       | CE (eV) |
|----|---------------------------------------------------------|----------|-----------------|-------------------|------------------------------------------------|-----------|-------------------|------------------------------------------------------------------------------------------|---------|
| 1  | 12-OH-JA                                                | 3.52     | 226.1205        | M-H               | C <sub>12</sub> H <sub>18</sub> O <sub>4</sub> |           | B, D              | [M-H] <sup>-</sup> 225.1132, 59.0128                                                     | 12      |
| 2  | 12-O-Glc-JA                                             | 3.24     | 388.1733        | M-H               | C <sub>12</sub> H <sub>18</sub> O <sub>4</sub> |           | B, D              | [M-H] <sup>-</sup> 387.1608, 207.0981 [M-Glc-H <sub>2</sub> O] <sup>-</sup> , 59.0122    | 25      |
| 3  | SA                                                      | 4.17     | 138.0316        | M-H               | C <sub>12</sub> H <sub>18</sub> O <sub>4</sub> | MID 616   | A                 | [M-H] <sup>-</sup> 137.0221, 93.0330                                                     | 12      |
| 4  | 2-O-Glc-SA                                              | 2.72     | 300.0845        | M-H               | C <sub>12</sub> H <sub>18</sub> O <sub>4</sub> | MID 616   | C                 | [M-H] <sup>-</sup> 299.0756, 137.0225 [M-Glc] <sup>-</sup> , 93.0328                     | 12      |
| 5  | ω-OH-16:0                                               | 6.72     | 272.2351        | M-H               | C <sub>12</sub> H <sub>18</sub> O <sub>4</sub> | MID 85386 | A, D              | [M-H] <sup>-</sup> 271.2267, 253.218, 225.2191, 59.0139                                  | 32      |
| 6  | ω-O-Glc-16:0                                            | 5.81     | 434.2879        | M-H               | C <sub>12</sub> H <sub>18</sub> O <sub>4</sub> | MID 85386 | C                 | [M-H] <sup>-</sup> 433.2742, 415.2679, 271.2281 [M-Glc] <sup>-</sup> , 59.0139           | 25      |
| 7  | UDP-glucose                                             | 0.72     | 566.0550        | M-H               | C <sub>12</sub> H <sub>18</sub> O <sub>4</sub> | MID 97    | A                 | [M-H] <sup>-</sup> 565.0449, 384.9825, 323.0267, 241.0108, 78.9583                       | 18      |
| 8  | UDP                                                     | 0.86     | 404.0021        | M-H               | C <sub>12</sub> H <sub>18</sub> O <sub>4</sub> | MID 5886  | A                 | [M-H] <sup>-</sup> 402.9882, 305.0114, 272.9530, 158.9226, 111.017                       | 20      |
| 9  | 11-HHT                                                  | 6.10     | 266.1881        | M-H               | C <sub>12</sub> H <sub>18</sub> O <sub>4</sub> |           | A                 | [M-H] <sup>-</sup> 265.1790, 247.1695, 195.1026, 167.1083                                | 18      |
| 10 | 11-O-Glc-HHT                                            | 5.63     | 428.2410        | M-H               | C <sub>12</sub> H <sub>18</sub> O <sub>4</sub> |           | C                 | [M-H] <sup>-</sup> 427.23129, 265.1785 [M-Glc] <sup>-</sup> , 247.1681                   | 25      |
| 11 | 13-HOT                                                  | 7.11     | 294.2194        | M-H               | C <sub>12</sub> H <sub>18</sub> O <sub>4</sub> |           | A, D              | [M-H] <sup>-</sup> 293.2117, 275.162                                                     | 15      |
| 12 | 13-O-Glc-HOT                                            | 6.05     | 456.2723        | M-H               | C <sub>12</sub> H <sub>18</sub> O <sub>4</sub> |           | C                 | [M-H] <sup>-</sup> 455.2660, 293.2117 [M-Glc] <sup>-</sup> , 275.1950, 223.1275          | 25      |
| 13 | C <sub>11</sub> H <sub>18</sub> O <sub>3</sub>          | 6.01     | 198.1255        | M+H               | C <sub>12</sub> H <sub>18</sub> O <sub>4</sub> |           |                   | [M+H] <sup>+</sup> 199.1888, 181.1221, 125.0595, 111.0438, 55.0541                       | 12      |
| 14 | C <sub>11</sub> H <sub>18</sub> O <sub>3</sub> -Glc     | 5.01     | 360.1784        | M+NH <sub>4</sub> | C <sub>12</sub> H <sub>18</sub> O <sub>4</sub> |           |                   | [M+H] <sup>+</sup> 378.2452, 199.1327[M-Glc] <sup>-</sup> , 181.1221, 163.1112, 111.0440 | 18      |
| 15 | 12-COOH-JA                                              | 4.31     | 240.0998        | M-H M+H           | C <sub>12</sub> H <sub>18</sub> O <sub>4</sub> |           | A                 | [M-H] <sup>-</sup> 239.095, 195.105, 59.013                                              | 12      |
| 16 | 12-OH-JA-Ile                                            | 4.94     | 339.2045        | M-H M+H           | C <sub>12</sub> H <sub>18</sub> O <sub>4</sub> |           | E                 |                                                                                          |         |
| A  | MS/MS fragment information from literature/data base    |          |                 |                   |                                                |           |                   |                                                                                          |         |
| B  | MS/MS fragment information from identical standard      |          |                 |                   |                                                |           |                   |                                                                                          |         |
| C  | MS/MS fragment information of non-glycosylated standard |          |                 |                   |                                                |           |                   |                                                                                          |         |
| D  | Co-elution of authentic standard                        |          |                 |                   |                                                |           |                   |                                                                                          |         |
| E  | Exact mass measurement only                             |          |                 |                   |                                                |           |                   |                                                                                          |         |

*UGT76E1 glycosylates 12-hydroxy-jasmonic acid*

**Table S4: Buffer concentrations for protein purifications**

| Enzyme        | Buffer        |                 |                     |
|---------------|---------------|-----------------|---------------------|
| UGT76E1       | HisTALON      |                 |                     |
|               | 50            | mM              | Tris/HCl pH 9.0     |
|               | 100           | mM              | NaCl                |
|               | 0.1           | %               | Tween20             |
|               | 200           | mM              | Imidazol (buffer B) |
|               | Gelfiltration |                 |                     |
| 50            | mM            | Tris/HCl pH 9.0 |                     |
| 100           | mM            | NaCl            |                     |
| UGT76E2       | HisTrap       |                 |                     |
|               | 50            | mM              | Tris/HCl pH 8.0     |
|               | 100           | mM              | NaCl                |
|               | 0.1           | %               | Tween20             |
|               | 500           | mM              | Imidazol (buffer B) |
|               | Gelfiltration |                 |                     |
| 50            | mM            | Tris/HCl pH 8.0 |                     |
| 100           | mM            | NaCl            |                     |
| UGT76E11      | HisTrap       |                 |                     |
|               | 20            | mM              | Tris/HCl pH 7.5     |
|               | 50            | mM              | NaCl                |
|               | 0.1           | %               | Tween20             |
|               | 10            | %               | Glycerol            |
|               | 500           | mM              | Imidazol (buffer B) |
| Gelfiltration |               |                 |                     |
| 20            | mM            | Tris/HCl pH 7.5 |                     |
| 50            | mM            | NaCl            |                     |
| UGT76E12      | HisTrap       |                 |                     |
|               | 20            | mM              | Tris/HCl pH 7.5     |
|               | 50            | mM              | NaCl                |
|               | 10            | %               | Glycerol            |
|               | 500           | mM              | Imidazol (buffer B) |
|               | Gelfiltration |                 |                     |
| 20            | mM            | Tris/HCl pH 7.5 |                     |
| 50            | mM            | NaCl            |                     |
| UGT74F1       | HisTrap       |                 |                     |
|               | 50            | mM              | Tris/HCl pH 7.5     |
|               | 100           | mM              | NaCl                |
|               | 0.1           | %               | Tween20             |
|               | 500           | mM              | Imidazol (buffer B) |
|               | Gelfiltration |                 |                     |
| 50            | mM            | Tris/HCl pH 7.5 |                     |
| 100           | mM            | NaCl            |                     |
| Wash buffer   | HisTrap       |                 |                     |
|               | 50            | mM              | Tris/HCl pH 7.5     |
|               | 100           | mM              | NaCl                |
|               | 2             | mM              | DTT                 |
|               | 5             | mM              | ATP                 |
|               | 5             | mM              | MgCl <sub>2</sub>   |
| 20            | mM            | Imidazol        |                     |

*UGT76E1 glycosylates 12-hydroxy-jasmonic acid*

**Table S5: Oligonucleotides used in this work**

| Name           | Sequence                                   | Item                 | rest. site |
|----------------|--------------------------------------------|----------------------|------------|
| UGT76E1-fwd    | ACGCATATGATGGAAGAAGCTAGGAGTGAAGAGAAG       | Cloning / expression | NdeI       |
| UGT76E1-rev    | ACGCTCGAGGTGAACAATGATTTTGTCTATAAATGC       | Cloning / expression | XhoI       |
| UGT76E2-fwd    | ACGCATATGGAGGAAAAGCAAG                     | Cloning / expression | NdeI       |
| UGT76E2-rev    | ACGCTCGAGCATGGAATTAAC                      | Cloning              | XhoI       |
| UGT76E11-fwd   | ACGCATATGGAGGAAAAGCC                       | Cloning              | NdeI       |
| UGT76E11-rev   | ACGCTCGAGTAGAGTCCCTCATG                    | Cloning              | XhoI       |
| UGTE12-fwd     | ACGCATATGATGCAGGTTTTGGGAATGGAGG            | Cloning              | NdeI       |
| UGTE12-rev     | ACGCTCGAGTCATAGAGTCCCTATGAAGTGTAC          | Cloning              | XhoI       |
| UGT74F1-fwd    | ACGGAATTCGAGAAGATGAGAGG                    | Cloning              | EcoRI      |
| UGT74F1-rev    | ACGCTCGAGTCATTTGATTTGAATTT                 | Cloning              | XhoI       |
| E1-q-left      | TGCCAACTTCAGCATTTGGG                       | qPCR                 |            |
| E1-q-right     | ACCATGCCAAAGATGAGCTC                       | qPCR                 |            |
| E2-q-left_new  | GAGCTCATCTTTGGCAAGGTG                      | qPCR                 |            |
| E2-q-right_new | TTCAACCACTCAACGCAACTC                      | qPCR                 |            |
| E11-q-left     | TTTTGGAGCCATTGCGGATG                       | qPCR                 |            |
| E11-q-right    | ATCACTGGAAAACGGCTTGC                       | qPCR                 |            |
| E12-q-left     | TCGTCACCATTCCAGAAAGC                       | qPCR                 |            |
| E12-q-right    | TTGTTGCAGCACCAACTGAC                       | qPCR                 |            |
| SGT-q-left     | AAACCTTCGGCTCCAAAACC                       | qPCR                 |            |
| SGT-q-right    | ATCCATTGCAAGGTCAAGCG                       | qPCR                 |            |
| LOX2Fwd        | GGGCGTACTGGTCGTGGTTA                       | qPCR                 |            |
| LOX2Rev        | TGCACGAGCGTTGATTTCCATG                     | qPCR                 |            |
| VSP1F          | AGAGCTGGAGCTGGTGTGTGTTAA                   | qPCR                 |            |
| VSP2F          | GAACACCCATTCCGGTAACACCA                    | qPCR                 |            |
| PDF1.2Fa       | AGAAGTTGTGCGAGAAGCCA                       | qPCR                 |            |
| PDF1.2R a      | CACTTGTGAGCTGGGAAGACA                      | qPCR                 |            |
| ORA59.2-F      | GATCAGGCGGCTTTTCGCTT                       | qPCR                 |            |
| ORA59.2-R      | CAGCACCTAAATCCTCAAGAACC                    | qPCR                 |            |
| ST2a-for       | CTGAGGGCCTACTATATACG                       | qPCR                 |            |
| ST2a-rev       | CGACAAACTTCGGTGTGAC                        | qPCR                 |            |
| JOX2           | CTCATCCCCATGCTTTCATC                       | qPCR                 |            |
| JOX2           | TCCGAGTTCACTATCACTCTATGC                   | qPCR                 |            |
| RNS1_fwd       | GTGTTGTTATCCAAATTCAGGC                     | qPCR                 |            |
| RNS1_rev       | CATGCTTCTCCCATTTCGTG                       | qPCR                 |            |
| Actin8-RT_for  | GGTTTTCCCCAGTGTGTTG                        | qPCR                 |            |
| Actin8-RT_rev  | CTCCATGTCATCCCAGTTGC                       | qPCR                 |            |
| U6-29p-F       | TTAATCCAAACTACTGCAGCCTGAC                  | CRISPR-Sequencing    |            |
| U6-29p-R       | AGCCCTCTTCTTTCGATCCATCAAC                  | CRISPR-Sequencing    |            |
| U6-1t-F        | GCTAAGACAAAGTGATTGGTCCGTT                  | CRISPR-Sequencing    |            |
| U6-1t-R        | AACGGACCAATCACTTTGTCTTAGC                  | CRISPR-Sequencing    |            |
| A-DT1-BsF      | ATATATGGTCTCGATTGCGGGAAGGCTCTTTACTCCAGTT   | CRISPR/Cas9          |            |
| A-DT1-F0       | TGCGGGAAGGCTCTTTACTCCAGTTTTAGAGCTAGAAATAGC | CRISPR/Cas9          |            |
| A-DT0-BsR2     | ATATATTGGTCTCAATCTCTTAGTCGACTCTACCAAT      | CRISPR/Cas9          |            |

*UGT76E1 glycosylates 12-hydroxy-jasmonic acid*

|                       |                                                   |             |
|-----------------------|---------------------------------------------------|-------------|
| A-DT2-BsF2            | ATATTATTGGTCTCAAGATTGCAGACTCAGTTAAGCTGCCTGTT      | CRISPR/Cas9 |
| A-DT2-F0              | TGCAGACTCAGTTAAGCTGCCTGTTTTAGAGCTAGAAATAGC        | CRISPR/Cas9 |
| A-DT0-BsR3            | ATATTATTGGTCTCATCACTACTTCGTCTCTAACCAT             | CRISPR/Cas9 |
| A-DT3-BsF3            | ATATTATTGGTCTCAGTGATTGCTCTGGTAAGCTTCTGGAAGTT      | CRISPR/Cas9 |
| A-DT3-F0              | TGCTCTGGTAAGCTTCTGGAAGTTTTAGAGCTAGAAATAGC         | CRISPR/Cas9 |
| A-DT4-R0              | AACAACAGTCCTTGAAGCTCACCAATCACTACTTCGACTCTAGCTGTAT | CRISPR/Cas9 |
| A-DT4-BsR             | ATTATTGGTCTCTAAACAACAGTCCTTGAAGCTCAC              | CRISPR/Cas9 |
| UGT76E1-detect (rev)  | CGGTCAAGCTGCCTGGG                                 | Seq-CRISPR  |
| UGT76E2-detect (rev)  | CAGGATCTTTCATGTCG                                 | Seq-CRISPR  |
| UGT76E11-detect (rev) | CGTTTTGTTGTCCTTTGGG                               | Seq-CRISPR  |
| UGT76E12-detect (rev) | CTTTGGCTGCAGCTTCAGC                               | Seq-CRISPR  |
| UGT76E2-int-rev       | TGACCCCGGAATAGAGCCCGGTCTGAC                       | Expression  |

---

*UGT76E1 glycosylates 12-hydroxy-jasmonic acid*

**Table S6: CRISPR target sequences for *UGT76E1*, *UGT76E2*, *UGT76E11*, and *UGT76E12***

Targets were chosen with the help of three online tools: CRISPRdirect (<https://crispr.dbcls.jp/>), CRISPR-P (<http://crispr.hzau.edu.cn/CRISPR2/>), and The Genetic Perturbation Platform for designing sgRNAs for CRISPRko (<http://portals.broadinstitute.org/gpp/public/analysis-tools/sgrna-design>). The best targets are listed which were used integrated into the CRISPR/Cas9 vector.

| Target          | Sequence                | Strand | Off targets           | Score | On target efficiency | GC content [%] |
|-----------------|-------------------------|--------|-----------------------|-------|----------------------|----------------|
| <i>UGT76E1</i>  | CGGGAAGGCTCTTTACTCCAAGG | +      | 0                     | 99    | 0.57                 | 55             |
| <i>UGT76E2</i>  | CCCAGGCAGCTTAACTGAGTCTG | -      | 0                     | 95    | 0.51                 | 50             |
| <i>UGT76E11</i> | CCATTCCAGAAAGCTTACCAGAG | -      | 1 ( <i>UGT76E12</i> ) | 49    | 0.51                 | 45             |
| <i>UGT76E12</i> | GGTGAGCTTCAAGGACTGTTTGG | +      | 0                     | 71    | 0.39                 | 50             |
